# Supplementary material for: Cationic PCP iridaepoxide and carbene complexes for facile water elimination and activation processes
Source: Royal Society of Chemistry journal article supplement (doi:10.1039/c7dt00563f), 2017-01-01
Supplement: c7dt00563f1.pdf [file c7dt00563f1.pdf]

## Electronic Supporting Information

### Cationic PCP iridaepoxide and carbene complexes for facile water elimination and activation processes.

Lauren E. Doyle, Warren E. Piers,\* David W. Bi

University of Calgary, Department of Chemistry, 2500 University Drive N.W., Calgary, Alberta, Canada, T2N 1N4.

#### Contents

|                                                                                                                                               |     |
|-----------------------------------------------------------------------------------------------------------------------------------------------|-----|
| General Considerations                                                                                                                        | S2  |
| <b>Figure S1.</b> $^1\text{H}$ NMR spectra of the reaction of $\text{Me}_3\text{SiNTf}_2$ with <b>2-Cl</b> .                                  | S3  |
| <b>Figure S2.</b> Variable temperature $^{31}\text{P}\{^1\text{H}\}$ NMR spectra (243 MHz) of <b>4-Cl</b> .                                   | S4  |
| <b>Figure S3.</b> Molecular structure of <b>4-Cl</b> .                                                                                        | S4  |
| <b>Figure S4.</b> $^1\text{H}$ NMR spectrum of <b>4-OH</b> in $\text{CD}_2\text{Cl}_2$ .                                                      | S5  |
| <b>Figure S5.</b> $^1\text{H}$ NMR spectrum of <b>3-NTf<sub>2</sub></b> in $\text{CD}_2\text{Cl}_2$ .                                         | S5  |
| <b>Figure S6.</b> $^{31}\text{P}\{^1\text{H}\}$ and $^{19}\text{F}$ NMR spectra of <b>3-NTf<sub>2</sub></b> in $\text{CD}_2\text{Cl}_2$ .     | S6  |
| <b>Figure S7.</b> $^{13}\text{C}\{^1\text{H}\}$ NMR spectrum of <b>3-NTf<sub>2</sub></b> in $\text{CD}_2\text{Cl}_2$ .                        | S6  |
| <b>Figure S8.</b> $^{31}\text{P}\{^1\text{H}\}$ NMR spectrum in of the reaction of <b>3-Cl</b> , $\text{AgNTf}_2$ and excess water.           | S7  |
| <b>Figure S9.</b> $^1\text{H}$ NMR spectrum of <b>4-OPh</b> in $\text{CD}_2\text{Cl}_2$ .                                                     | S7  |
| <b>Figure S10.</b> $^{31}\text{P}\{^1\text{H}\}$ (left) and $^{19}\text{F}$ (right) NMR spectra of <b>4-OPh</b> in $\text{CD}_2\text{Cl}_2$ . | S8  |
| <b>Figure S11.</b> $^{13}\text{C}\{^1\text{H}\}$ NMR spectrum of <b>4-OPh</b> in $\text{CD}_2\text{Cl}_2$ .                                   | S8  |
| <b>Figure S12.</b> $^1\text{H}$ NMR spectrum of <b>2-NTf<sub>2</sub></b> in $\text{CD}_2\text{Cl}_2$ .                                        | S9  |
| <b>Figure S13.</b> $^{31}\text{P}\{^1\text{H}\}$ and $^{19}\text{F}$ NMR spectra of <b>2-NTf<sub>2</sub></b> in $\text{CD}_2\text{Cl}_2$ .    | S9  |
| <b>Figure S14.</b> $^{13}\text{C}\{^1\text{H}\}$ NMR spectrum of <b>2-NTf<sub>2</sub></b> in $\text{CD}_2\text{Cl}_2$ .                       | S10 |
| <b>Figure S15.</b> $^1\text{H}$ NMR spectrum of <b>3-OPh</b> in $\text{CD}_2\text{Cl}_2$ .                                                    | S10 |
| <b>Figure S16.</b> $^{13}\text{C}\{^1\text{H}\}$ NMR spectrum of <b>3-OPh</b> in $\text{CD}_2\text{Cl}_2$ .                                   | S11 |

|                                                                                                                               |     |
|-------------------------------------------------------------------------------------------------------------------------------|-----|
| <b>Figure S17.</b> $^1\text{H}$ NMR spectrum of <b>4-Cl</b> in $\text{CD}_2\text{Cl}_2$ .                                     | S11 |
| <b>Figure S18.</b> $^{31}\text{P}\{^1\text{H}\}$ and $^{19}\text{F}$ NMR spectra of <b>4-Cl</b> in $\text{CD}_2\text{Cl}_2$ . | S12 |
| <b>Figure S19.</b> $^{13}\text{C}\{^1\text{H}\}$ NMR spectrum of <b>4-Cl</b> in $\text{CD}_2\text{Cl}_2$ .                    | S12 |
| <b>Figure S20.</b> $^{13}\text{C}\{^1\text{H}\}$ NMR spectrum of <b>4-OH</b> in $\text{CD}_2\text{Cl}_2$ .                    | S13 |
| <b>Figure S21.</b> $^1\text{H}$ NMR spectrum of <b>5</b> in $\text{CD}_2\text{Cl}_2$ .                                        | S13 |
| <b>Figure S22.</b> $^{13}\text{C}\{^1\text{H}\}$ NMR spectrum of <b>5</b> in $\text{CD}_2\text{Cl}_2$ .                       | S14 |
| <b>Figure S23.</b> $^1\text{H}$ NMR spectrum of <b>6-acetone</b> in acetone- $d_6$ .                                          | S14 |
| <b>Figure S24.</b> $^{13}\text{C}\{^1\text{H}\}$ NMR spectrum of <b>6-acetone</b> in acetone- $d_6$ .                         | S15 |
| <b>Table S1.</b> Data collection and structure refinement details.                                                            | S16 |

**General Considerations.** Storage and manipulation of all compounds were performed under an argon atmosphere either in a VAC glove box or using a double manifold high vacuum line using standard techniques. Pentane and hexanes were dried and purified using a Grubbs/Dow solvent purification system and stored in 500 mL thick-walled vessels over sodium/benzophenone ketal. Dichloromethane and dichloromethane- $d_2$  were dried over calcium hydride and vacuum transferred into thick-walled vessels for storage over activated sieves. Acetonitrile and acetone- $d_6$  were dried and stored over activated sieves. Bromobenzene- $d_5$  was dried and stored over sodium/benzophenone ketal. All dried solvents were degassed and vacuum distilled prior to use.  $^1\text{H}$  and  $^{13}\text{C}$  NMR chemical shifts were referenced to residual solvent protons and naturally abundant  $^{13}\text{C}$  resonances for all deuterated solvents. Prior to acquisition all other spectra were referenced to external standards:  $^{19}\text{F}$  ( $\text{C}_6\text{F}_6$  in bromobenzene- $d_5$ ),  $^{31}\text{P}$  (85%  $\text{H}_3\text{PO}_4$  in  $\text{D}_2\text{O}$ ). NMR spectra were processed and analyzed with MestReNova (v9.0.1-13254) NMR software. Chemical shift assignments are based on  $^1\text{H}$ ,  $^{13}\text{C}\{^1\text{H}\}$ ,  $^{31}\text{P}\{^1\text{H}\}$ ,  $^{19}\text{F}$ ,  $^1\text{H}$ - $^1\text{H}$ -COSY,  $^1\text{H}$ - $^{13}\text{C}$ -HSQC and  $^1\text{H}$ - $^{13}\text{C}$ -HMBC NMR experiments performed on Bruker RDQ-400, Ascend-500 or Avance-600 spectrometers. Ultra High Purity Hydrogen was purchased from Praxair and used as received. Nitrous oxide (99%) was purchased from Sigma-Aldrich and used as received. All other reagents were purchased from Sigma-Aldrich and used as received. X-ray crystallographic analyses were performed on either a Nonius KappaCCD diffractometer or a Bruker Smart diffractometer equipped with Apex II detector. Samples were coated in Paratone 8277 oil

(Exxon) and mounted on a glass fibre. Full crystallography details can be found in independently uploaded .cif files. All Elemental analyses were obtained by the Instrumentation Facility of the Department of Chemistry, University of Calgary. Solution high resolution-mass spectrometry experiments were performed on a Kratos MS-80 spectrometer (direct ESI-MS or APCI-MS) on samples prepared in the glove box in a gas tight syringe.

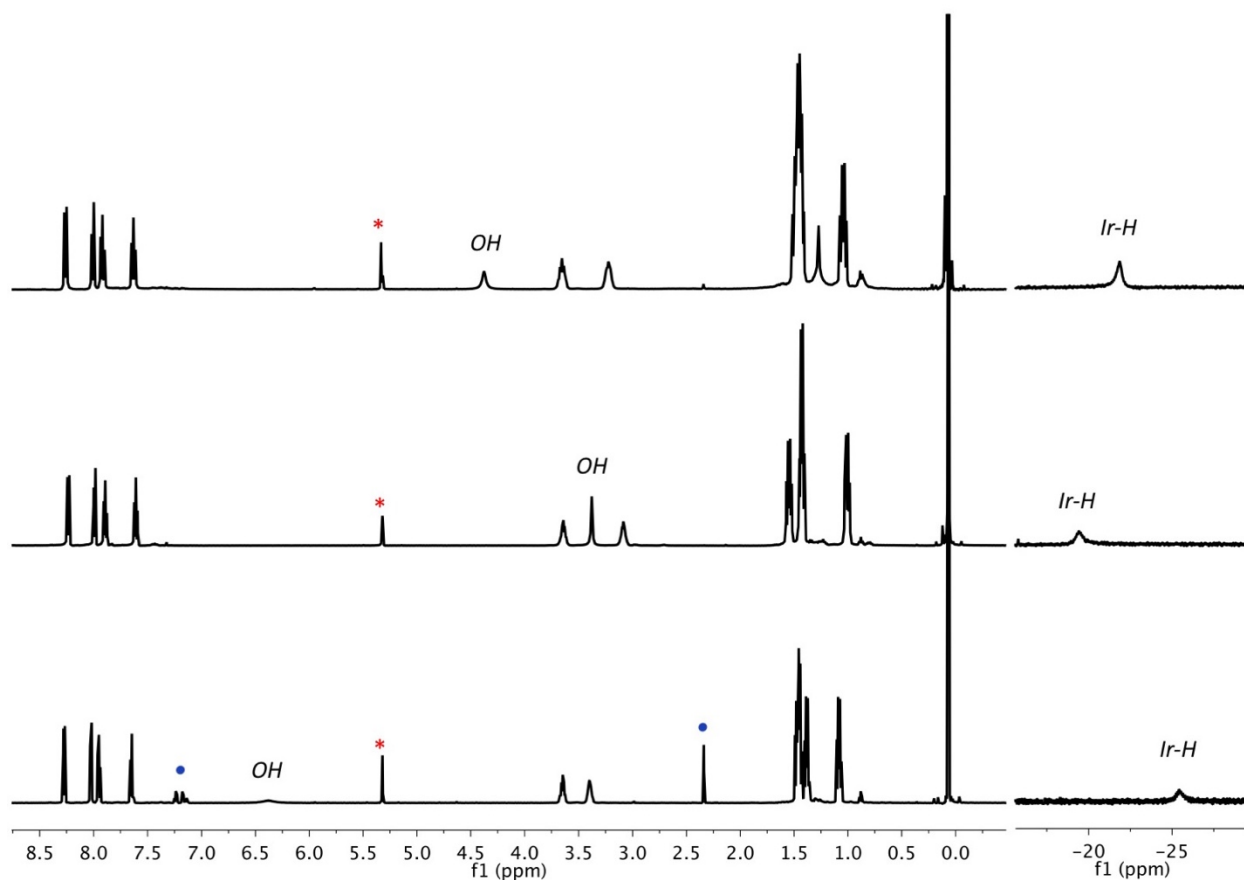

**Figure S1.** Three different room temperature *in situ*  $^1\text{H}$  NMR spectra (500 MHz) of the reaction of  $\text{Me}_3\text{SiNTf}_2$  with **2-Cl** at  $-20\text{ }^\circ\text{C}$  in  $\text{CD}_2\text{Cl}_2$ . The solvent is indicated with an asterisk and signals corresponding to residual *o*-xylene are indicated by blue circles.

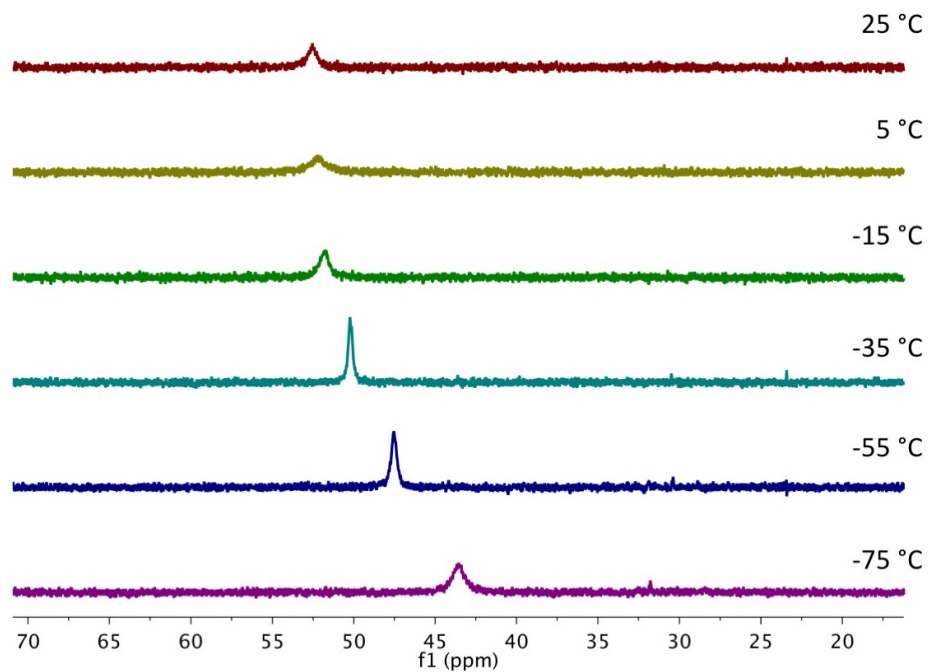

**Figure S2.** Variable temperature  $^{31}\text{P}\{^1\text{H}\}$  NMR spectra (243 MHz) of 4-Cl.

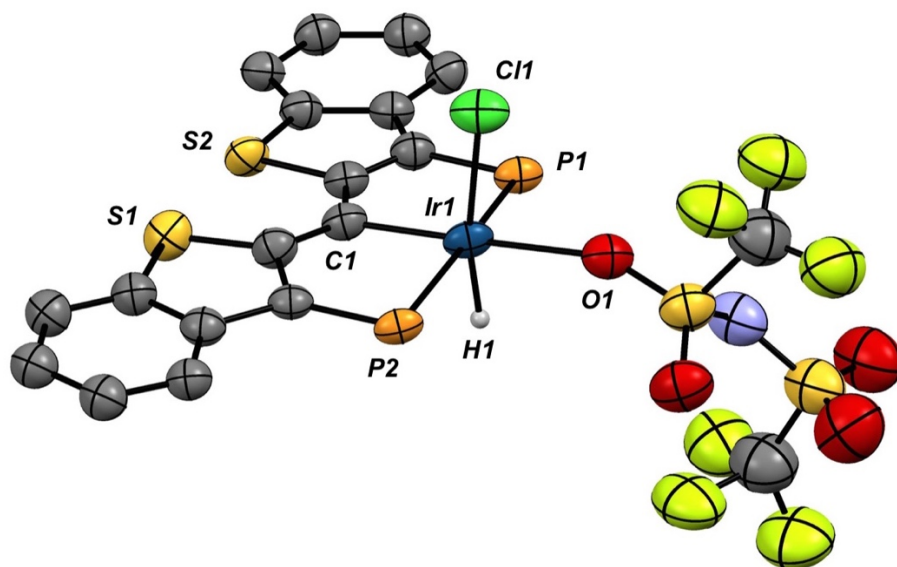

**Figure S3.** Molecular structure of 4-Cl. Hydrogen atoms except H1 have been omitted for clarity. Displacement ellipsoids are shown at the 50% probability level. Data collection for this structure is incomplete.

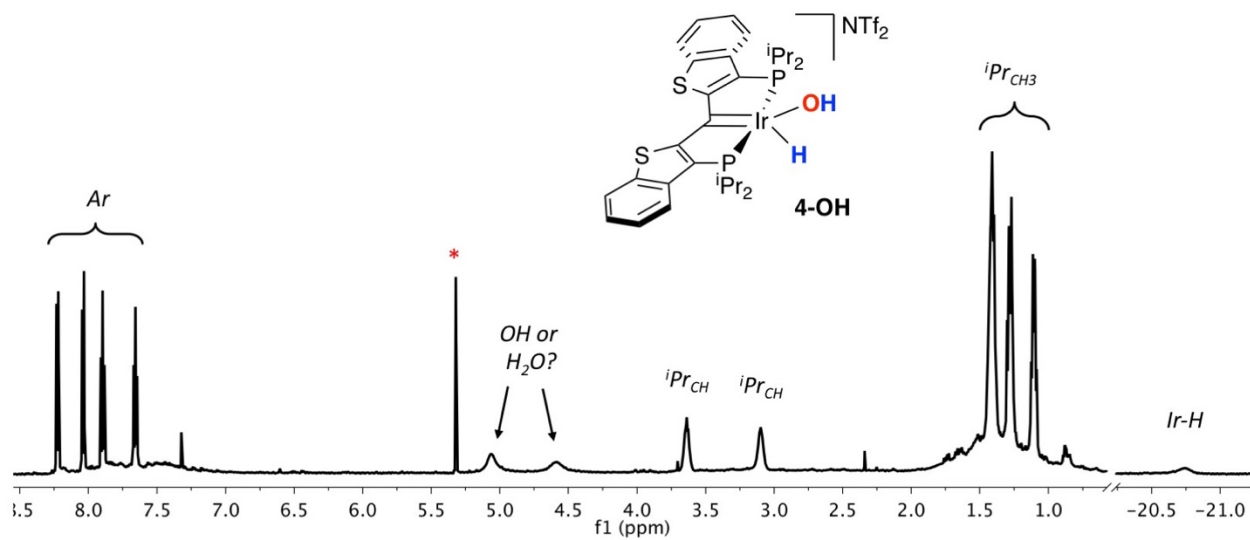

**Figure S4.**  $^1\text{H}$  NMR spectrum of **4-OH** in  $\text{CD}_2\text{Cl}_2$  (indicated with an asterisk).

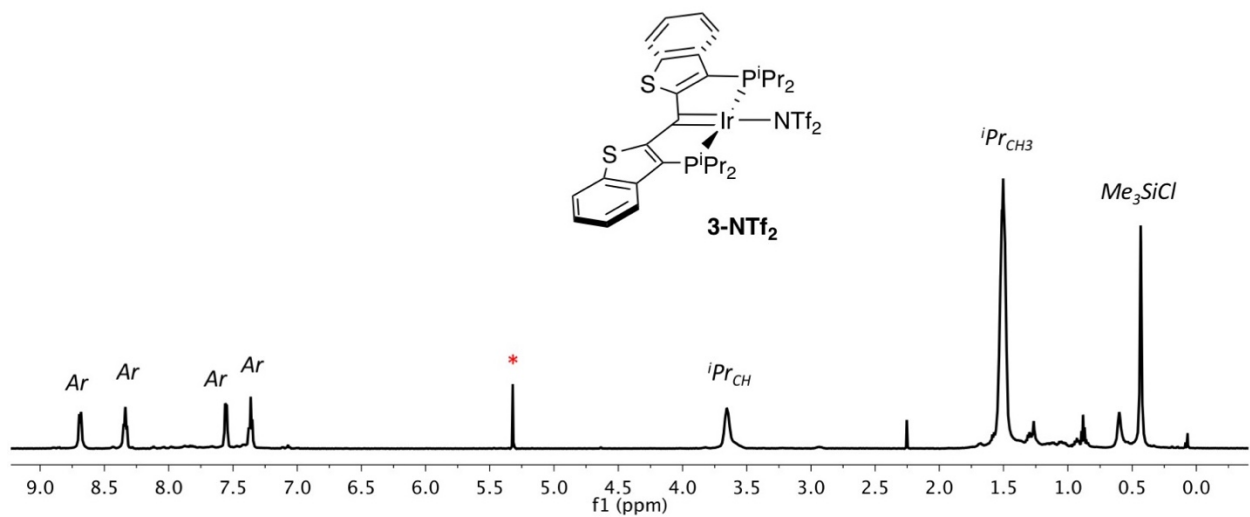

**Figure S5.**  $^1\text{H}$  NMR spectrum of **3-NTf<sub>2</sub>** in  $\text{CD}_2\text{Cl}_2$  (indicated with an asterisk).

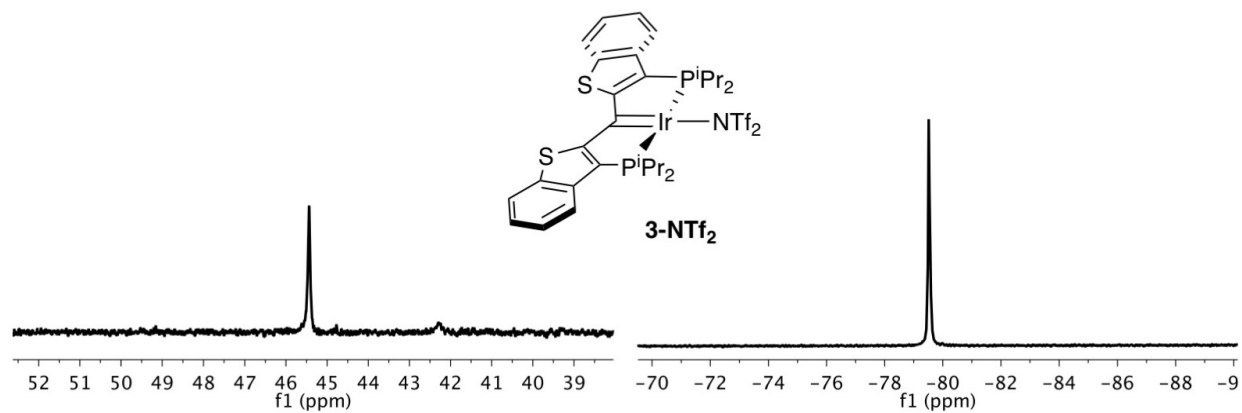

**Figure S6.**  $^{31}\text{P}\{^1\text{H}\}$  (left) and  $^{19}\text{F}$  (right) NMR spectra of **3-NTf<sub>2</sub>** in  $\text{CD}_2\text{Cl}_2$ .

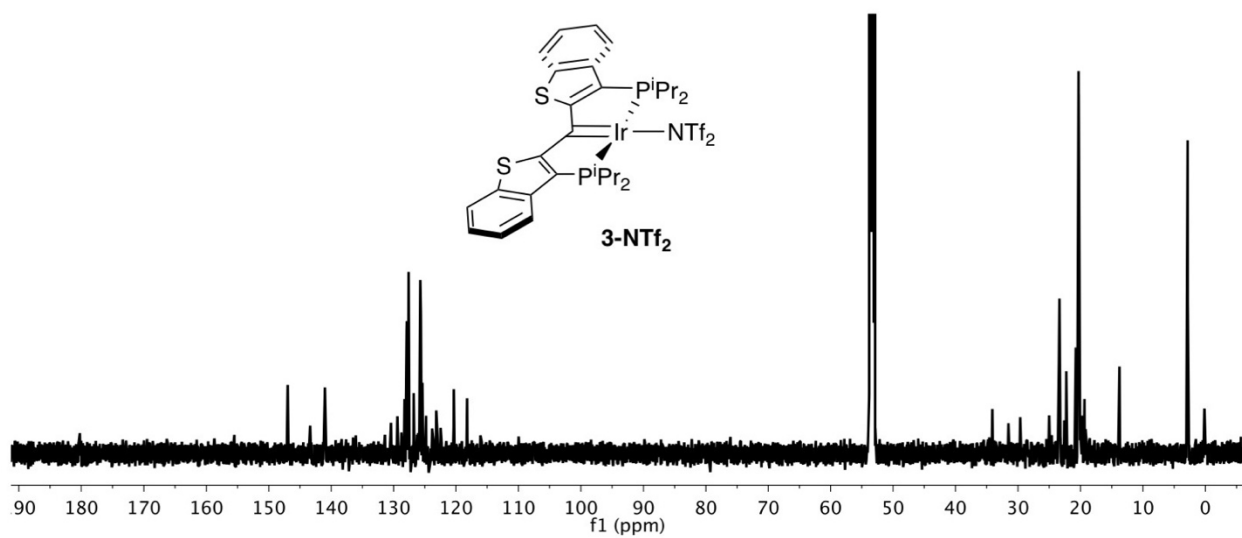

**Figure S7.**  $^{13}\text{C}\{^1\text{H}\}$  NMR spectrum of **3-NTf<sub>2</sub>** in  $\text{CD}_2\text{Cl}_2$ .

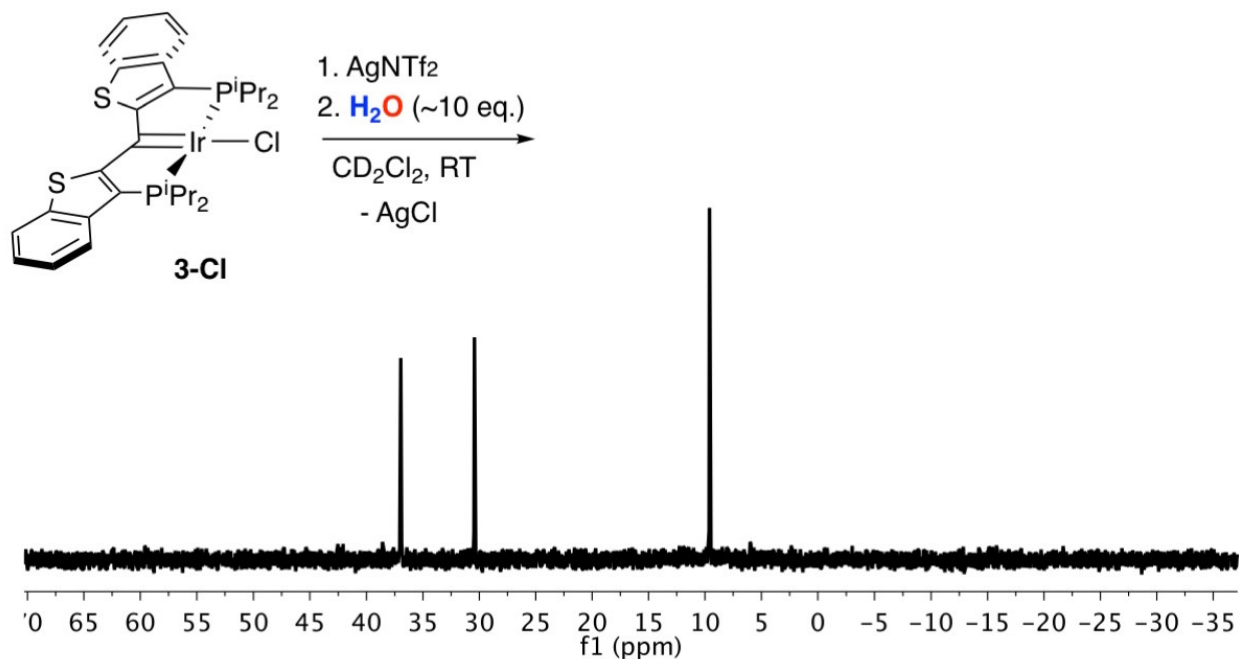

**Figure S8.**  $^{31}\text{P}\{^1\text{H}\}$  NMR spectrum in  $\text{CD}_2\text{Cl}_2$  of the reaction of **3-Cl**,  $\text{AgNTf}_2$  and excess water.

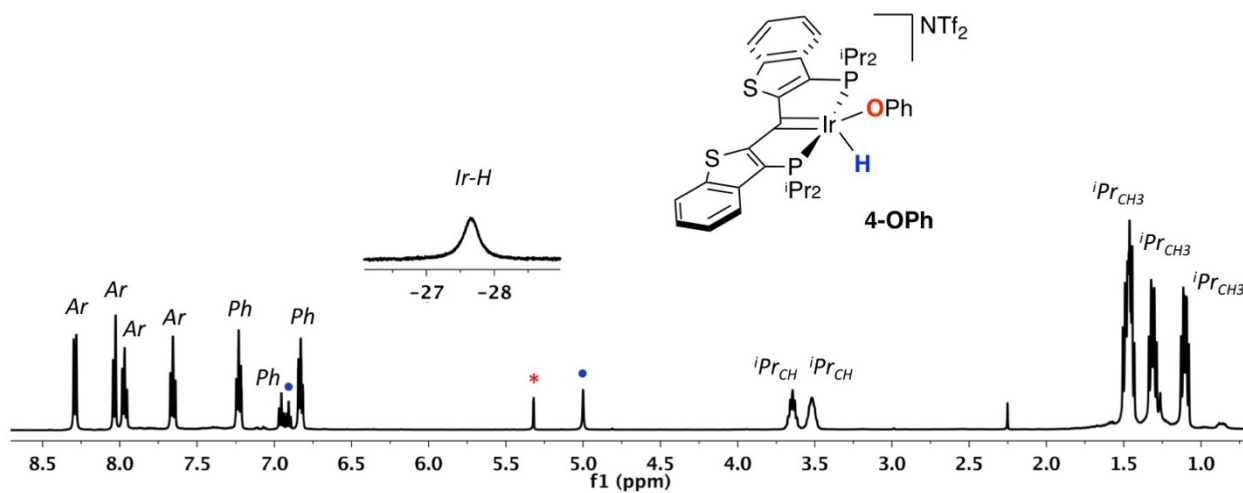

**Figure S9.**  $^1\text{H}$  NMR spectrum of **4-OPh** in  $\text{CD}_2\text{Cl}_2$  (indicated with an asterisk). Blue circles correspond to excess phenol.

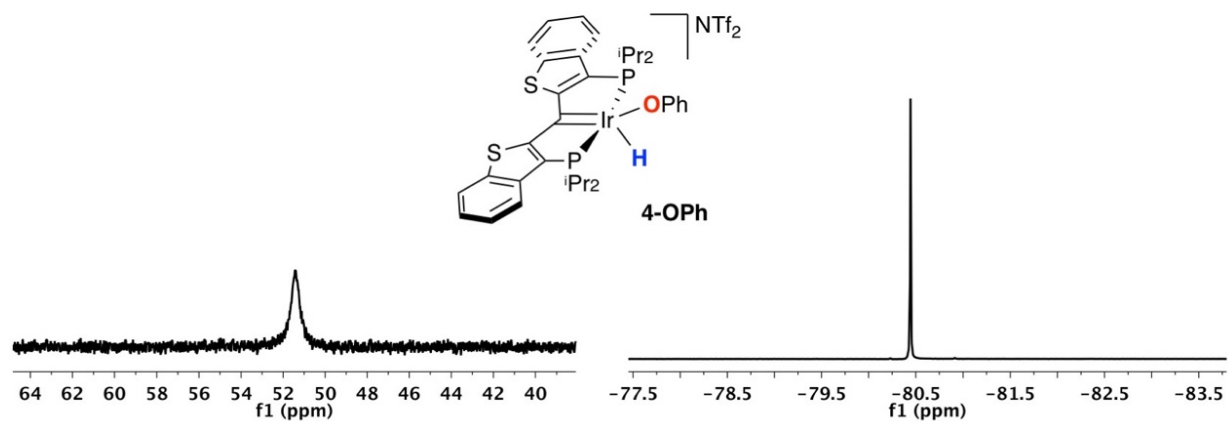

**Figure S10.**  $^{31}\text{P}\{^1\text{H}\}$  (left) and  $^{19}\text{F}$  (right) NMR spectra of **4-OPh** in  $\text{CD}_2\text{Cl}_2$ .

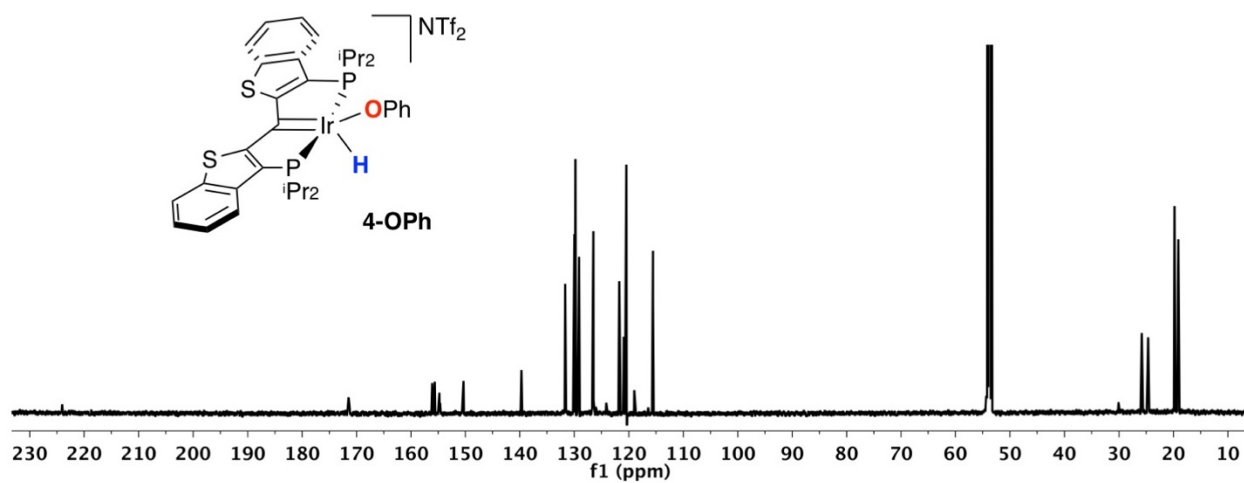

**Figure S11.**  $^{13}\text{C}\{^1\text{H}\}$  NMR spectrum of **4-OPh** in  $\text{CD}_2\text{Cl}_2$ .



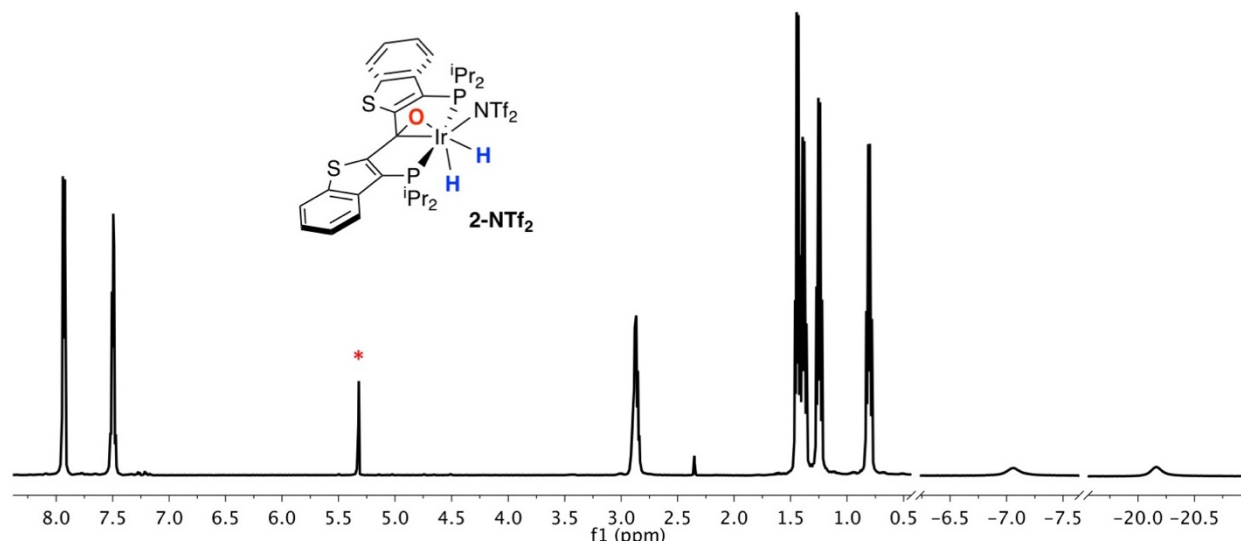

**Figure S12.**  $^1\text{H}$  NMR spectrum of **2-NTf<sub>2</sub>** in  $\text{CD}_2\text{Cl}_2$  (indicated with an asterisk).

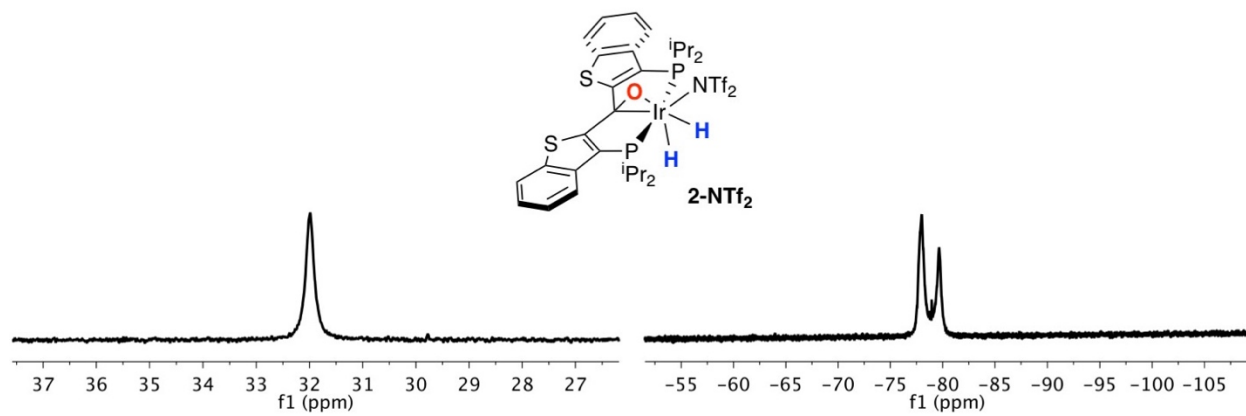

**Figure S13.**  $^{31}\text{P}\{^1\text{H}\}$  (left) and  $^{19}\text{F}$  (right) NMR spectra of **2-NTf<sub>2</sub>** in  $\text{CD}_2\text{Cl}_2$ .

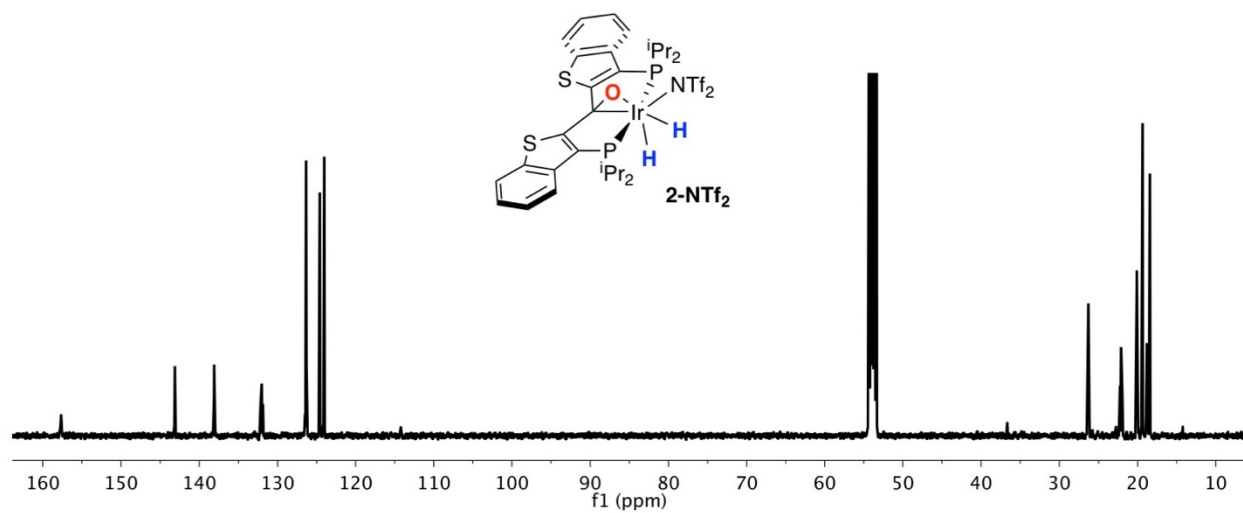

**Figure S14.**  $^{13}\text{C}\{^1\text{H}\}$  NMR spectrum of **2-NTf<sub>2</sub>** in  $\text{CD}_2\text{Cl}_2$ .

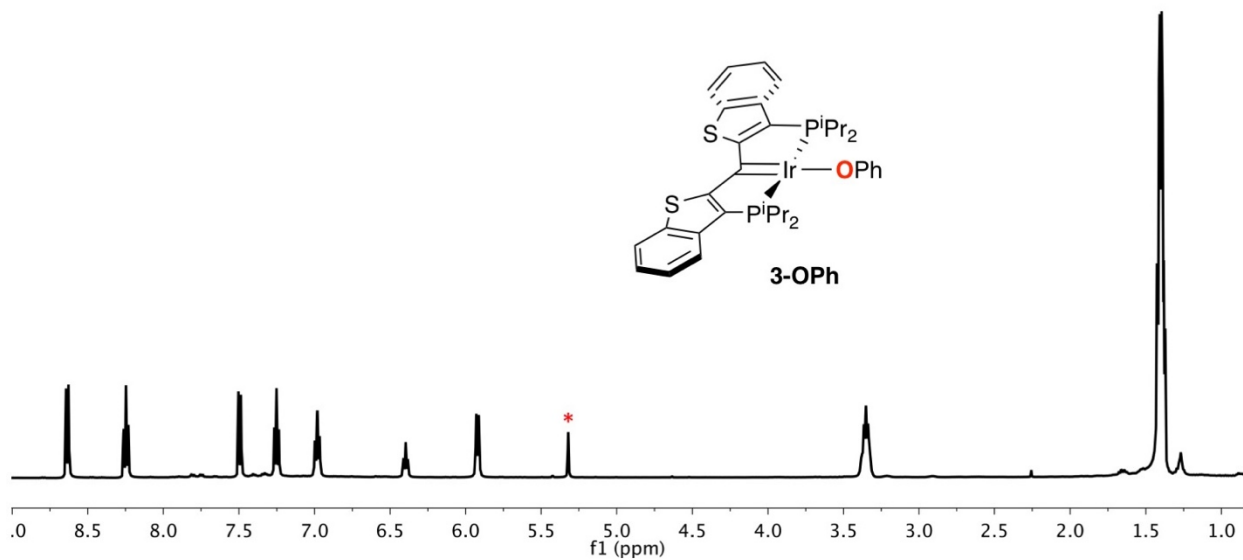

**Figure S15.**  $^1\text{H}$  NMR spectrum of **3-OPh** in  $\text{CD}_2\text{Cl}_2$  (indicated with an asterisk).

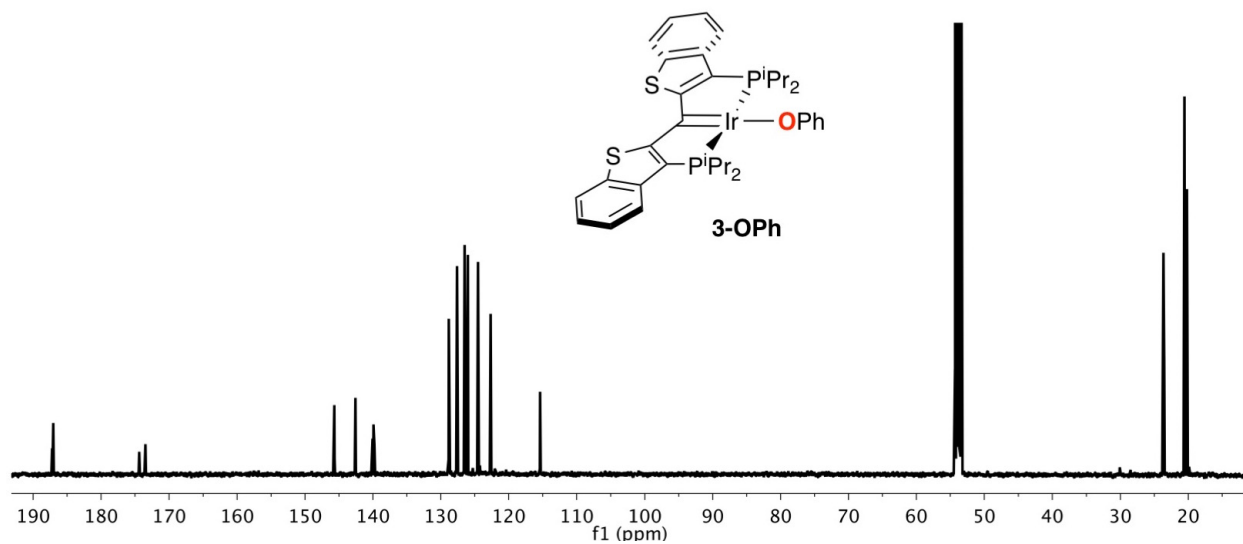

**Figure S16.**  $^{13}\text{C}\{^1\text{H}\}$  NMR spectrum of **3-OPh** in  $\text{CD}_2\text{Cl}_2$ .

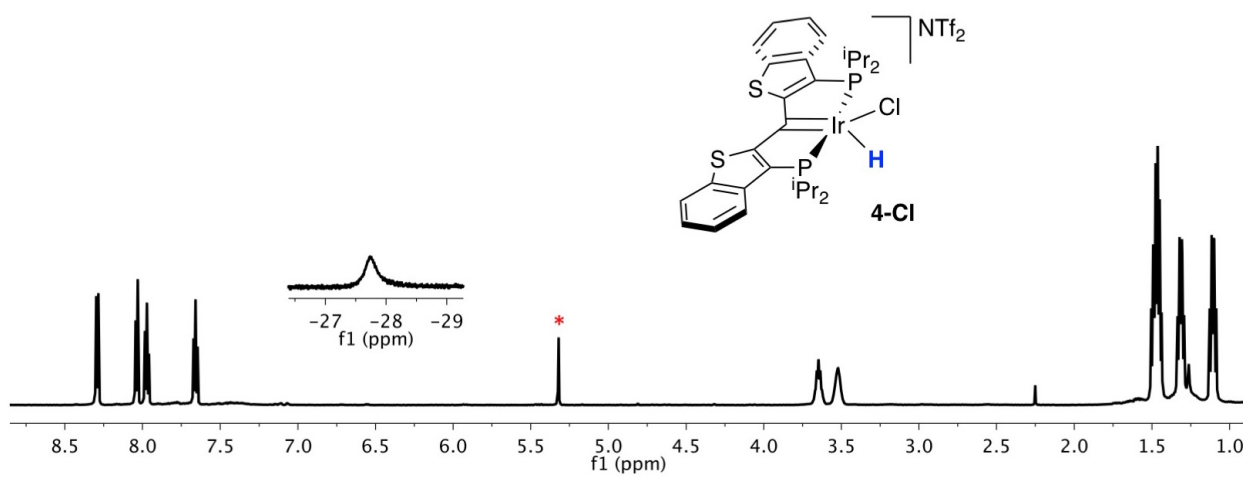

**Figure S17.**  $^1\text{H}$  NMR spectrum of **4-Cl** in  $\text{CD}_2\text{Cl}_2$  (indicated with an asterisk).

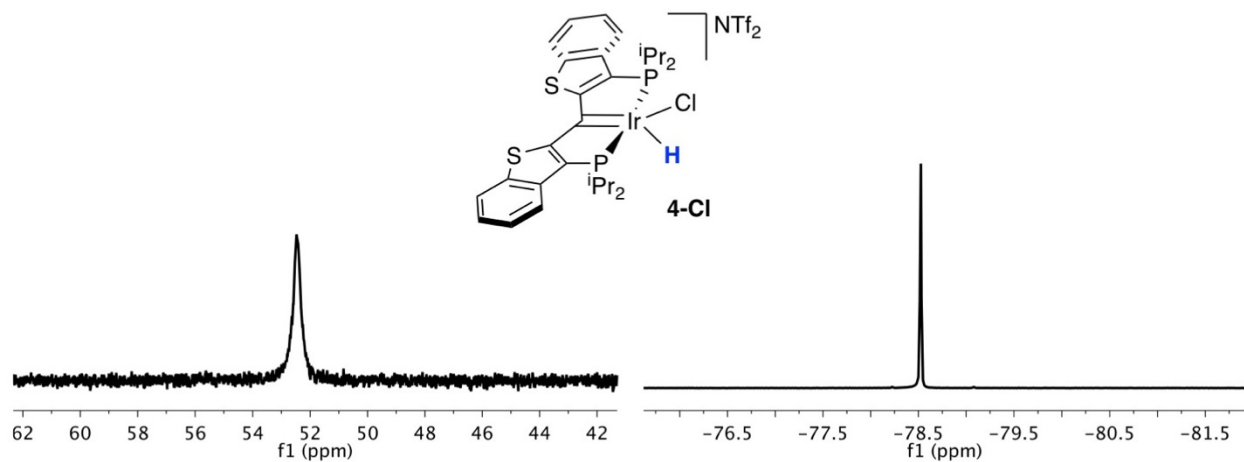

**Figure S18.**  $^{31}\text{P}\{^1\text{H}\}$  (left) and  $^{19}\text{F}$  (right) NMR spectra of **4-Cl** in  $\text{CD}_2\text{Cl}_2$ .

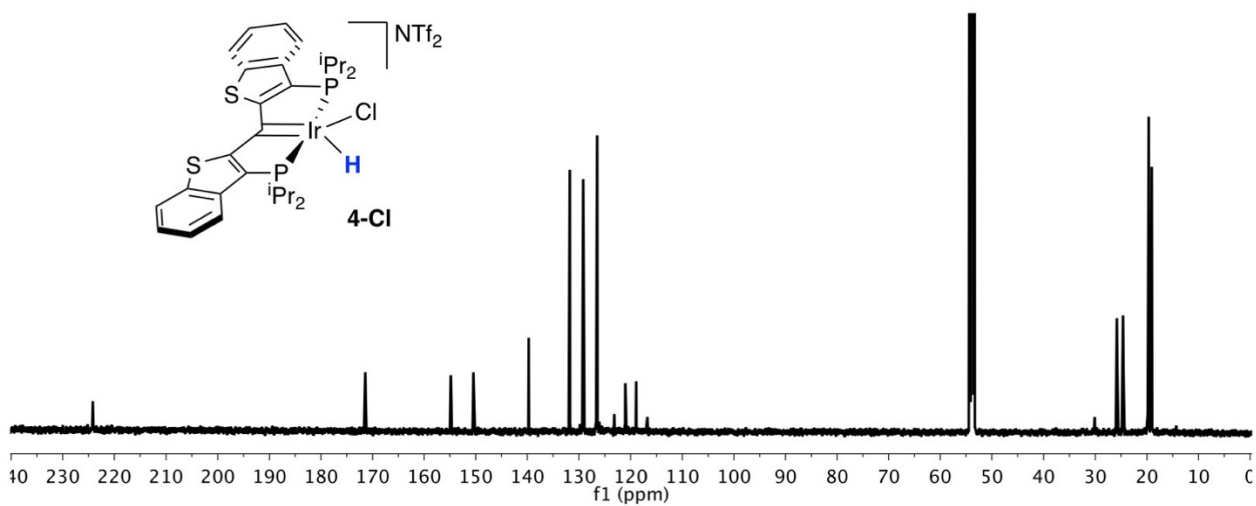

**Figure S19.**  $^{13}\text{C}\{^1\text{H}\}$  NMR spectrum of **4-Cl** in  $\text{CD}_2\text{Cl}_2$ .

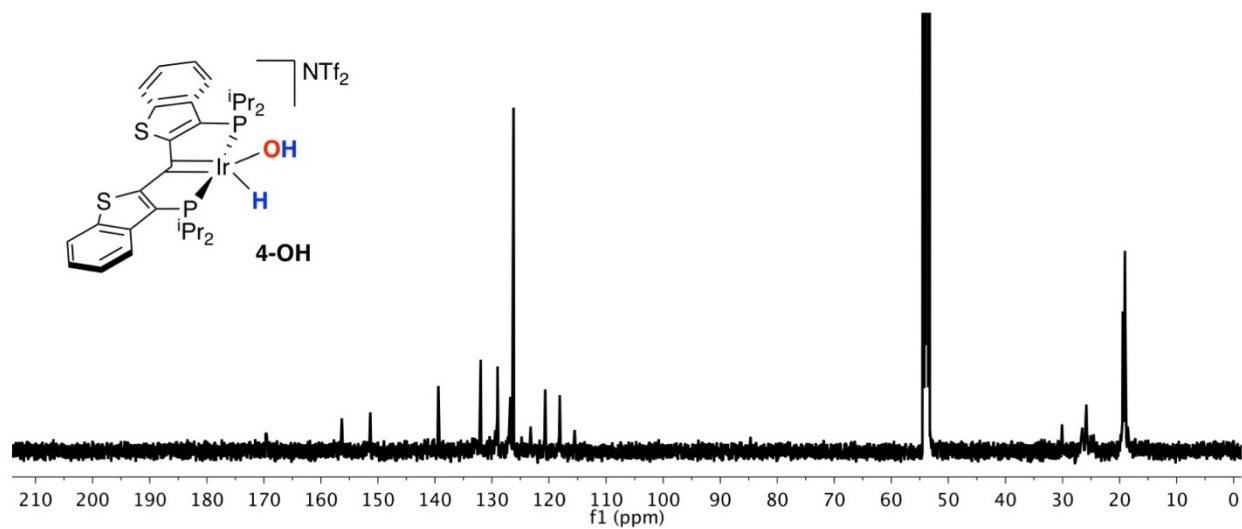

**Figure S20.**  $^{13}\text{C}\{^1\text{H}\}$  NMR spectrum of **4-OH** in  $\text{CD}_2\text{Cl}_2$ .

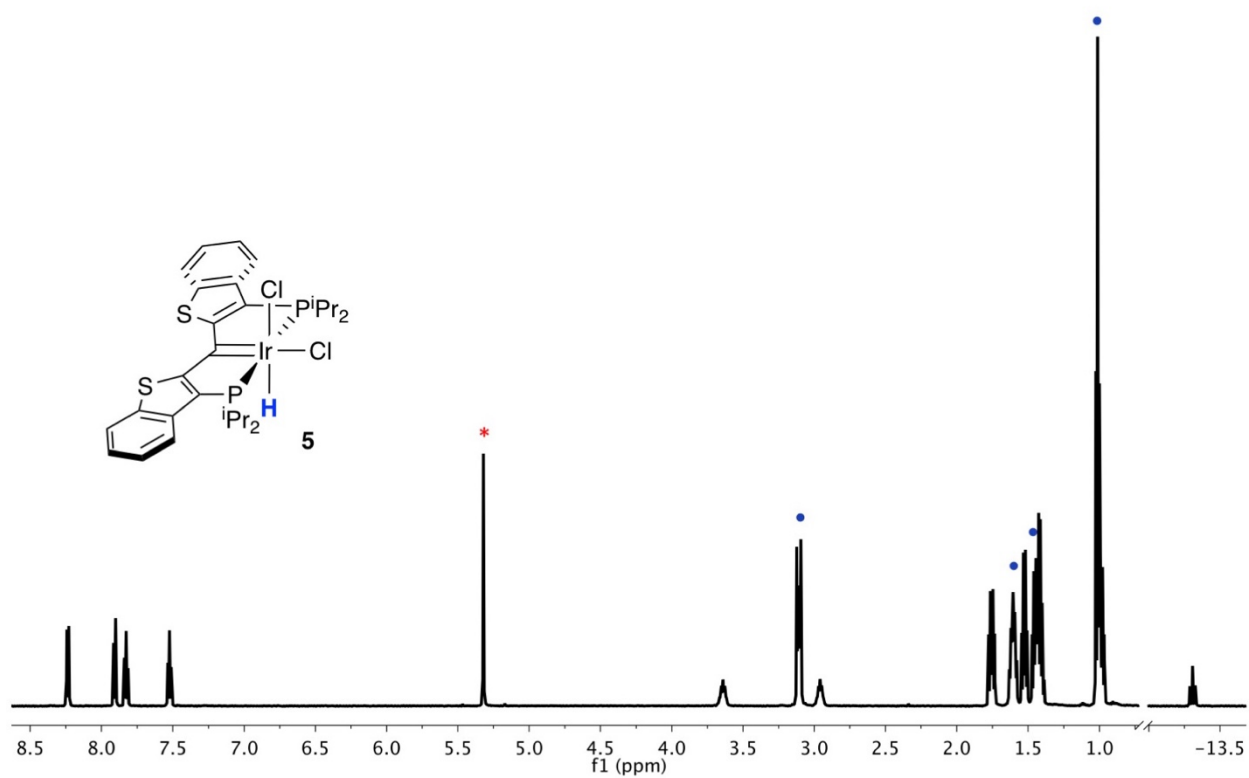

**Figure S21.**  $^1\text{H}$  NMR spectrum of **5** in  $\text{CD}_2\text{Cl}_2$  (indicated with an asterisk). Blue circles indicate the  $n\text{Bu}_4\text{NNTf}_2$  byproduct.

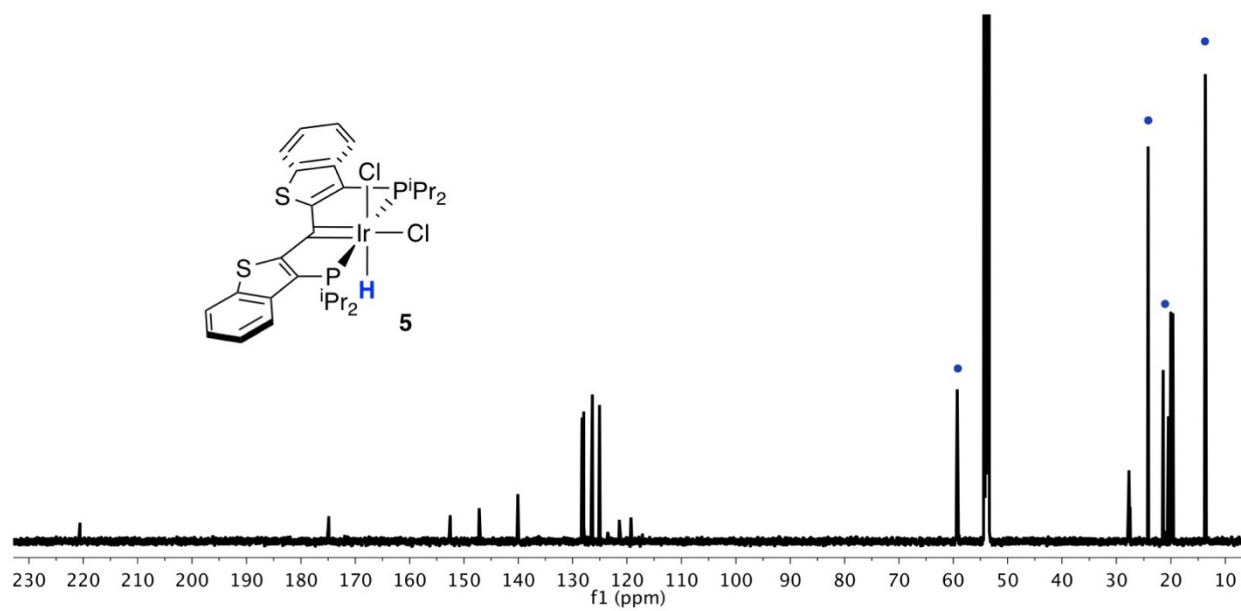

**Figure S22.**  $^{13}\text{C}\{^1\text{H}\}$  NMR spectrum of **5** in  $\text{CD}_2\text{Cl}_2$ . Blue circles indicate the  $^n\text{Bu}_4\text{NNTf}_2$  byproduct.

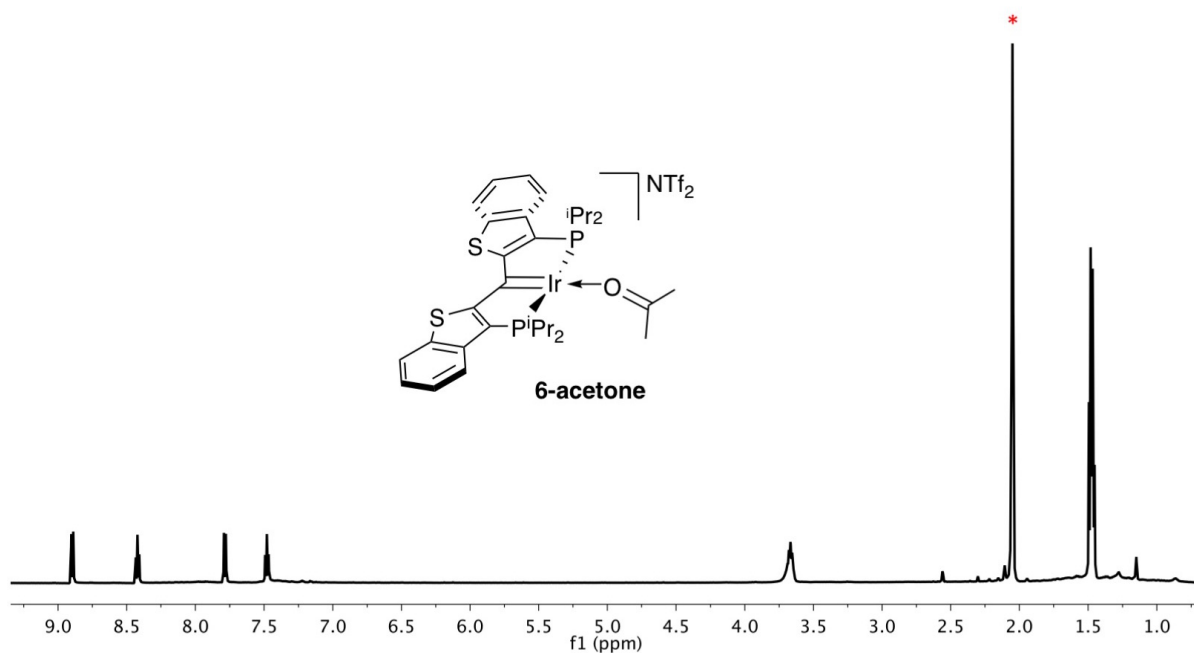

**Figure S23.**  $^1\text{H}$  NMR spectrum of **6-acetone** in acetone- $d_6$  (indicated with an asterisk).

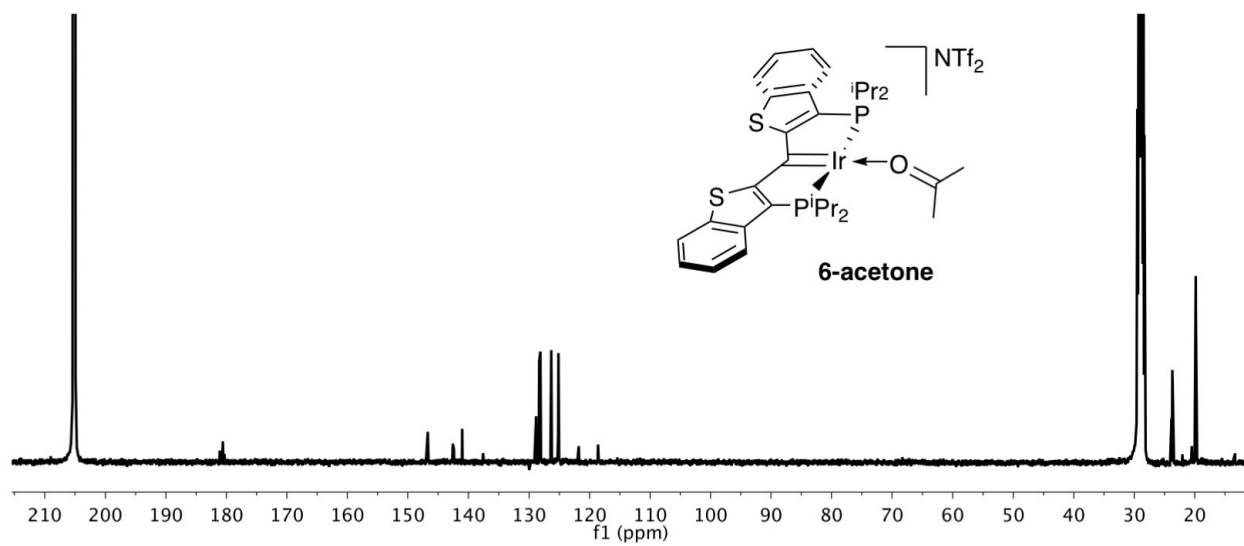

**Figure S24.**  $^{13}\text{C}\{^1\text{H}\}$  NMR spectrum of **6-acetone** in  $\text{acetone-}d_6$ .

**Table S1.** Data collection and structure refinement details for **4-Cl**, **2-NTf<sub>2</sub>** and **6-acetone**.

|                                                             | <b>4-Cl</b>                                                                                         | <b>2-NTf<sub>2</sub></b>                                                                          | <b>6-acetone</b>                                                                                                                                                     |
|-------------------------------------------------------------|-----------------------------------------------------------------------------------------------------|---------------------------------------------------------------------------------------------------|----------------------------------------------------------------------------------------------------------------------------------------------------------------------|
| <b>formula</b>                                              | C <sub>31</sub> H <sub>37</sub> ClF <sub>6</sub> IrNO <sub>4</sub><br>P <sub>2</sub> S <sub>4</sub> | C <sub>31</sub> H <sub>38</sub> F <sub>6</sub> IrNO <sub>5</sub><br>P <sub>2</sub> S <sub>4</sub> | C <sub>32</sub> H <sub>42</sub> IrOP <sub>2</sub> S <sub>2</sub> ,<br>C <sub>2</sub> F <sub>6</sub> NO <sub>4</sub> S <sub>2</sub> , C <sub>3</sub> H <sub>6</sub> O |
| <b><i>fw</i></b>                                            | 1202.29                                                                                             | 1001.00                                                                                           | 1099.14                                                                                                                                                              |
| <b>crystal system</b>                                       | Triclinic                                                                                           | Orthorhombic                                                                                      | Triclinic                                                                                                                                                            |
| <b>space group</b>                                          | P -1                                                                                                | P b c a                                                                                           | P -1                                                                                                                                                                 |
| <b><i>a</i> (Å)</b>                                         | 11.448(2)                                                                                           | 19.0520(3)                                                                                        | 8.095(2)                                                                                                                                                             |
| <b><i>b</i> (Å)</b>                                         | 14.330(3)                                                                                           | 16.3670(8)                                                                                        | 15.580(3)                                                                                                                                                            |
| <b><i>c</i> (Å)</b>                                         | 23.826(5)                                                                                           | 23.8210(4)                                                                                        | 18.098(4)                                                                                                                                                            |
| <b><i>α</i> (deg)</b>                                       | 104.190(4)                                                                                          | 90                                                                                                | 102.04(3)                                                                                                                                                            |
| <b><i>β</i> (deg)</b>                                       | 94.070(4)                                                                                           | 90                                                                                                | 90.11(3)                                                                                                                                                             |
| <b><i>γ</i> (deg)</b>                                       | 93.745(4)                                                                                           | 90                                                                                                | 92.16(3)                                                                                                                                                             |
| <b><i>V</i> (Å<sup>3</sup>)</b>                             | 3766.2(13)                                                                                          | 7428.0(4)                                                                                         | 2230.6(9)                                                                                                                                                            |
| <b><i>Z</i></b>                                             | 4                                                                                                   | 8                                                                                                 | 2                                                                                                                                                                    |
| <b><i>T</i> (K)</b>                                         | 173(2)                                                                                              | 173(2)                                                                                            | 173(2)                                                                                                                                                               |
| <b>Wavelength (Å)</b>                                       | 1.54178                                                                                             | 0.7107                                                                                            | 0.7107                                                                                                                                                               |
| <b><math>\rho_{\text{calcd}}</math> (g·cm<sup>-3</sup>)</b> | 2.120                                                                                               | 1.790                                                                                             | 1.636                                                                                                                                                                |
| <b><i>F</i>(000)</b>                                        | 2360                                                                                                | 3968                                                                                              | 1100                                                                                                                                                                 |
| <b><math>\mu</math> (mm<sup>-1</sup>)</b>                   | 9.966                                                                                               | 3.976                                                                                             | 3.320                                                                                                                                                                |
| <b>crystal size, mm<sup>3</sup></b>                         | 0.05×0.05×0.001                                                                                     | 0.720×0.560×0.420                                                                                 | 0.280×0.260×0.220                                                                                                                                                    |
| <b>transmission factors</b>                                 | ? – ?                                                                                               | 0.088 – 0.166                                                                                     | 0.416 – 0.478                                                                                                                                                        |
| <b><i>θ</i> range (deg)</b>                                 | 1.920 – 37.859                                                                                      | 3.045 – 27.508                                                                                    | 2.779 – 28.658                                                                                                                                                       |
| <b>data/restraints/param</b>                                | 3746/1433/953                                                                                       | 8514/154/467                                                                                      | 11422/7/623                                                                                                                                                          |
| <b>GOF</b>                                                  | 0.935                                                                                               | 1.062                                                                                             | 1.083                                                                                                                                                                |
| <b>R<sub>1</sub> [<i>I</i> &gt; 2σ(<i>I</i>)]</b>           | 0.0491                                                                                              | 0.0263                                                                                            | 0.0322                                                                                                                                                               |
| <b>wR<sub>2</sub> [all data]</b>                            | 0.1719                                                                                              | 0.0609                                                                                            | 0.0699                                                                                                                                                               |
| <b>residual density, e/Å<sup>3</sup></b>                    | 0.910 and -0.654                                                                                    | 0.713 and -0.911                                                                                  | 1.036 and -0.622                                                                                                                                                     |
